# Supplementary material for: Respiratory Monitoring by Ultrafast Humidity Sensors with Nanomaterials: A Review
Source: MDPI journal article supplement (doi:10.3390/s22031251), 2022-02-07
Supplement: s1 [file s1]

# Supplementary Materials for

## Respiratory Monitoring by Ultrafast Humidity Sensors with Nanomaterials: A Review

**Shinya Kano<sup>1,2,\*</sup>, Nutpaphat Jarulertwathana<sup>3</sup>, Syazwani Mohd-Noor<sup>3</sup>, Jerome K. Hyun<sup>3</sup>, Ryota Asahara<sup>4</sup>, and Harutaka Mekaru<sup>1,2</sup>**

<sup>1</sup>Human Augmentation Research Center, National Institute of Advanced Industrial Science and Technology (AIST), Kashiwa 277-8882, Japan

<sup>2</sup>Sensing System Research Center, National Institute of Advanced Industrial Science and Technology (AIST), Tsukuba 305-8563, Japan

<sup>3</sup>Department of Chemistry and Nanoscience, Ewha Womans University, Seoul 03760, Republic of Korea

<sup>4</sup>Human Informatics and Interaction Research Institute, National Institute of Advanced Industrial Science and Technology (AIST), Tsukuba 305-8566, Japan

\* Correspondence: shinya-kano@aist.go.jp

**Table S1.** Recent literature reporting fast-response humidity sensors for respiratory monitoring plotted in Figure 16(a). RH: relative humidity.  $R_n$ : resistance of nanomaterial film.  $C_n$ : capacitance of nanomaterial film.  $R_w$ : ionic resistance of adsorbed water molecular layer.

| Materials                                                  | Type                 | Response time (s) | Recovery time (s) | RH change | Reference                                         |
|------------------------------------------------------------|----------------------|-------------------|-------------------|-----------|---------------------------------------------------|
| graphene oxide                                             | resistance ( $R_n$ ) | 0.03              | 0.03              | 40-75%    | S. Borini, ACS Sens. 2013.[1]                     |
| supramolecular nanofibers                                  | resistance ( $R_n$ ) | 0.008             | 0.024             | 5-80%     | U. Mogera, Sci. Rep. 2014.[2]                     |
| supramolecular ionic material                              | resistance ( $R_n$ ) | 0.037             | 0.1               | 0-11%     | H. Yan, Anal. Chem. 2017.[3]                      |
| carbon nanocoil                                            | resistance ( $R_n$ ) | 1.9               | 1.5               | 0-16%     | J. Wu, ACS Appl. Mater. Interfaces 2019.[4]       |
| MXene nanosheet/polyelectrolyte multilayer                 | resistance ( $R_n$ ) | 0.11              | 0.22              | 20-40%    | H. An, ACS Appl. Nano Mater. 2019.[5]             |
| nanoporous cellulose nanofiber/carbon nanotube/paper fiber | resistance ( $R_n$ ) | 321               | 435               | 11-95%    | P. Zhu, ACS Appl. Mater. Interfaces 2020.[6]      |
| PEDOT:PSS micron line                                      | resistance ( $R_n$ ) | 0.86              | 0.59              | 42-69%    | G. Wang, RSC Advances 2020.[7]                    |
| tunnel-cracked nickel@polyurethane sponge                  | resistance ( $R_n$ ) | 0.8               | 3.6               | 10-70%    | Q. Wang, Sens. Act. B 2021.[8]                    |
| MXene/chitosan-quercetin multilayer                        | resistance ( $R_n$ ) | 0.75              | 1.6               | 1-90%     | X. Li, Sens. Act. B 2021.[9]                      |
| nafion                                                     | resistance ( $R_i$ ) | 0.04              | 0.03              | 0-98%     | P. Kuban, Anal. Chem. 2004.[10]                   |
| porous SnO <sub>2</sub>                                    | resistance ( $R_i$ ) | 200               | 8                 | 2-97%     | V. Solanki, ACS Appl. Mater. Interfaces 2017.[11] |
| silicon nanocrystal                                        | resistance ( $R_i$ ) | 12                | 2                 | 20-95%    | S. Kano, ACS Sens. 2017.[12]                      |
| WS <sub>2</sub> nanosheet                                  | resistance ( $R_i$ ) | 5                 | 6                 | 35-40%    | H. Guo, Nanoscale 2017.[13]                       |
| silica nanoparticle                                        | resistance ( $R_i$ ) | 31.4              | 6.5               | 30-84%    | S. Kano, ACS Sust. Chem. Eng. 2018.[14]           |
| NiPS <sub>3</sub> nanosheet                                | resistance ( $R_i$ ) | 3                 | 3                 | 0-32%     | R. N. Jenjeti, J. Mater. Chem. A 2019.[15]        |
| Ti <sub>3</sub> C <sub>2</sub> /Ag hybrid composite        | resistance ( $R_i$ ) | 0.08              | 0.12              | 5-95%     | N. Li, Nanoscale 2019.[16]                        |
| cellulose (paper)                                          | resistance ( $R_i$ ) | 472               | 19                | 7.2-91.5% | Z. Duan, ACS Appl. Mater. Interfaces 2019.[17]    |
| polyelectrolyte (PDMS, PPDS)                               | resistance ( $R_i$ ) | 0.29              | 0.47              | 33-95%    | J. Dai, ACS Appl. Mater. Interfaces 2019.[18]     |

|                                                                               |                               |       |       |            |                                                  |
|-------------------------------------------------------------------------------|-------------------------------|-------|-------|------------|--------------------------------------------------|
| <b>MoO<sub>3</sub> nanosheet</b>                                              | resistance (R <sub>i</sub> )  | 0.3   | 0.5   | 0-40%      | J. Yang, Small 2019.[19]                         |
| <b>gel polymer (MPOSS-PIL)</b>                                                | resistance (R <sub>i</sub> )  | 0.19  | 0.3   | 11-95%     | J. Dai, Sens. Act. B 2020.[20]                   |
| <b>polyacrylic acid</b>                                                       | resistance (R <sub>i</sub> )  | 1.2   | 0.6   | 11-95%     | J. Dai, Sens. Act. B 2020.[21]                   |
| <b>50-nm silica nanoparticle</b>                                              | resistance (R <sub>i</sub> )  | 2.8   | 2.3   | 30-70%     | S. Kano, Sensors 2020.[22]                       |
| <b>SnS<sub>2</sub> nanoflower/reduced graphene oxide</b>                      | resistance (R <sub>i</sub> )  | 4     | 3     | 0-33%      | D. Zhang, Nano Energy 2020.[23]                  |
| <b>Au nanoparticle modified TiO<sub>2</sub></b>                               | resistance (R <sub>i</sub> )  | 58    | 64    | 11-95%     | S. Yu, Ceramics International 2021.[24]          |
| <b>glycidyl trimethyl ammonium chloride modified cellulose</b>                | resistance (R <sub>i</sub> )  | 25    | 188   | 11-95%     | X. Guan, Sens. Act. B 2021.[25]                  |
| <b>coolmax/graphene oxide functionalized textile</b>                          | resistance (R <sub>i</sub> )  | 0.5   | 0.6   | 45-80%     | L. Xu, Chem. Eng. J. 2021.[26]                   |
| <b>graphite carbon nitride/zinc oxide</b>                                     | resistance (R <sub>i</sub> )  | 22    | 5     | 11-95%     | S. Yu, Sens. Act. B 2021.[27]                    |
| <b>Pb/HNb<sub>3</sub>O<sub>8</sub></b>                                        | resistance (R <sub>i</sub> )  | 0.2   | 3     | 30-96%     | Y. Lu, Nanoscale Horiz. 2021.[28]                |
| <b>Fe<sub>2</sub>O<sub>3</sub>-reduced graphene oxide nanohybrid</b>          | resistance (R <sub>i</sub> )  | 0.8   | 0.8   | 5-97%      | A. Kumar, J. Mater. Chem. C 2021.[29]            |
| <b>SnS<sub>2</sub> nanoflower/Zn<sub>2</sub>SnO<sub>4</sub> hollow sphere</b> | capacitance (C <sub>n</sub> ) | 18    | 1     | 0-97%      | D. Zhang ACS AMI 2018.[30]                       |
| <b>polyester fiber</b>                                                        | capacitance (C <sub>n</sub> ) | 3.5   | 4     | 6-33%      | L. Ma, Adv. Func. Mat. 2019.[31]                 |
| <b>In<sub>2</sub>O<sub>3</sub> nanocube/graphene oxide nanosheet</b>          | capacitance (C <sub>n</sub> ) | 15    | 2.5   | 0-43%      | B. Li, Sens Act B 2019.[32]                      |
| <b>CsPb<sub>2</sub>Br<sub>5</sub>/BaTiO<sub>3</sub></b>                       | capacitance (C <sub>n</sub> ) | 2     | 2     | 30-80%     | M.-Y. Cho, ACS Appl. Mater. Interfaces 2021.[33] |
| <b>reduced graphene oxide/WS<sub>2</sub> heterojunction</b>                   | capacitance (C <sub>n</sub> ) | 0.56  | 2.26  | 12.5-85.2% | L. Zhang, Sens. Act. B 2021.[34]                 |
| <b>PDDA/PSS layers</b>                                                        | light                         | 0.035 | 0.95  | 45-90%     | L. Yu, Mater. Horiz. 2017.[35]                   |
| <b>agarose coated fiber</b>                                                   | light                         | 0.05  | 0.7   | 60-90%     | J. Mathew, Sens. Act. A 2012.[36]                |
| <b>titania microsphere</b>                                                    | light                         | 0.02  | 0.038 | 20-90%     | S. Mohd-Noor J. Mater. Chem. A 2019.[37]         |
| <b>gold nanomembrane with optical fiber</b>                                   | light                         | 0.156 | 0.277 | 11-30%     | B. Du, Opt. Lett. 2020.[38]                      |

|                                                      |                 |       |       |                |                                                         |
|------------------------------------------------------|-----------------|-------|-------|----------------|---------------------------------------------------------|
| yolk-shell titania microsphere                       | light           | 0.013 | 0.028 | 20-90%         | N. Jarulertwathana, ACS Appl. Mat. Interfaces 2021.[39] |
| In <sub>2</sub> O <sub>3</sub> quantum dots          | frequency (QCM) | 14    | 16    | 0-75.3%        | H. Kan, RSC Advances 2019.[40]                          |
| bismuth oxychloride                                  | frequency (QCM) | 5.2   | 4.5   | 11.3-84.3%     | Q. Chen, ACS Omega 2020.[41]                            |
| gel polymer (MPOSS-PIL)                              | frequency (QCM) | 8.5   | 0.46  | 11-95%         | J. Dai, Sens. Act. B 2020.[20]                          |
| hematoporphyrin-lithium niobate                      | frequency (SAW) | 0.8   | 0.7   | 13-26%, 33-26% | R. Rimeika, Sens. Act. B 2009.[42]                      |
| graphene/polyvinyl alcohol/SiO <sub>2</sub>          | frequency (SAW) | 24    | 14.4  | 0-70%          | Y. Su, Sens. Act. B 2020.[43]                           |
| graphene oxide with oxygen-containing group gradient | voltage         | 3     | 3     | variation=30 % | F. Zhao, Adv. Mater. 2015.[44]                          |
| TiO <sub>2</sub> nanowire network                    | voltage         | 10    | 150   | 10-85%         | D. Shen, Adv. Mater. 2018.[45]                          |
| porous polydopamine with hydroxyl group gradient     | voltage         | 0.22  | 0.26  | 5-55%          | L. Li, Nano Lett. 2019.[46]                             |
| polypyrrole/melamine aerogel                         | voltage         | 1.1   | 4.5   | 50-75%         | X. Li, IEEE Sens. 2021.[47]                             |

1. Borini, S.; White, R.; Wei, D.; Astley, M.; Haque, S.; Spigone, E.; Harris, N.; Kivioja, J.; Ryhänen, T. Ultrafast Graphene Oxide Humidity Sensors. *ACS Nano* **2013**, *7*, 11166–11173, doi:10.1021/nn404889b.
2. Mogera, U.; Sagade, A.A.; George, S.J.; Kulkarni, G.U. Ultrafast response humidity sensor using supramolecular nanofibre and its application in monitoring breath humidity and flow. *Sci. Rep.* **2014**, *4*, 4103, doi:10.1038/srep04103.
3. Yan, H.; Zhang, L.; Yu, P.; Mao, L. Sensitive and Fast Humidity Sensor Based on A Redox Conducting Supramolecular Ionic Material for Respiration Monitoring. *Anal. Chem.* **2017**, *89*, 996–1001, doi:10.1021/acs.analchem.6b04350.
4. Wu, J.; Sun, Y.-M.; Wu, Z.; Li, X.; Wang, N.; Tao, K.; Wang, G.P. Carbon Nanocoil-Based Fast-Response and Flexible Humidity Sensor for Multifunctional Applications. *ACS Appl. Mater. Interfaces* **2019**, *11*, 4242–4251, doi:10.1021/acsami.8b18599.
5. An, H.; Habib, T.; Shah, S.; Gao, H.; Patel, A.; Echols, I.; Zhao, X.; Radovic, M.; Green, M.J.; Lutkenhaus, J.L. Water Sorption in MXene/Polyelectrolyte Multilayers for Ultrafast Humidity Sensing. *ACS Appl. Nano Mater.* **2019**, *2*, 948–955, doi:10.1021/acsanm.8b02265.
6. Zhu, P.; Ou, H.; Kuang, Y.; Hao, L.; Diao, J.; Chen, G. Cellulose Nanofiber/Carbon Nanotube Dual Network-Enabled Humidity Sensor with High Sensitivity and Durability. *ACS Appl. Mater. Interfaces* **2020**, *12*, 33229–33238, doi:10.1021/acsami.0c07995.

7. Wang, G.; Zhang, Y.; Yang, H.; Wang, W.; Dai, Y.Z.; Niu, L.G.; Lv, C.; Xia, H.; Liu, T. Fast-response humidity sensor based on laser printing for respiration monitoring. *RSC Adv.* **2020**, *10*, 8910–8916, doi:10.1039/c9ra10409g.
8. Wang, Q.; Tong, J.; Wang, N.; Chen, S.; Sheng, B. Humidity sensor of tunnel-cracked nickel@polyurethane sponge for respiratory and perspiration sensing. *Sensors Actuators, B Chem.* **2021**, *330*, 129322, doi:10.1016/j.snb.2020.129322.
9. Li, X.; Lu, Y.; Shi, Z.; Liu, G.; Xu, G.; An, Z.; Xing, H.; Chen, Q.; Han, R.P.S.; Liu, Q. Onion-inspired MXene/chitosan-quercetin multilayers: Enhanced response to H<sub>2</sub>O molecules for wearable human physiological monitoring. *Sensors Actuators, B Chem.* **2021**, *329*, 129209, doi:10.1016/j.snb.2020.129209.
10. Kuban, P.; Berg, J.M.; Dasgupta, P.K. Durable Microfabricated High-Speed Humidity Sensors. *Anal. Chem.* **2004**, *76*, 2561–2567, doi:10.1021/ac0355451.
11. Solanki, V.; Krupanidhi, S.B.; Nanda, K.K. Sequential Elemental Dealloying Approach for the Fabrication of Porous Metal Oxides and Chemiresistive Sensors Thereof for Electronic Listening. *ACS Appl. Mater. Interfaces* **2017**, *9*, 41428–41434, doi:10.1021/acsami.7b12127.
12. Kano, S.; Kim, K.; Fujii, M. Fast-Response and Flexible Nanocrystal-Based Humidity Sensor for Monitoring Human Respiration and Water Evaporation on Skin. *ACS Sensors* **2017**, *2*, 828–833, doi:10.1021/acssensors.7b00199.
13. Guo, H.; Lan, C.; Zhou, Z.; Sun, P.; Wei, D.; Li, C. Transparent, flexible, and stretchable WS<sub>2</sub> based humidity sensors for electronic skin. *Nanoscale* **2017**, *9*, 6246–6253, doi:10.1039/C7NR01016H.
14. Kano, S.; Fujii, M. All-Painting Process To Produce Respiration Sensor Using Humidity-Sensitive Nanoparticle Film and Graphite Trace. *ACS Sustain. Chem. Eng.* **2018**, *6*, 12217–12223, doi:10.1021/acssuschemeng.8b02550.
15. Jenjeti, R.N.; Kumar, R.; Sampath, S. Two-dimensional, few-layer NiPS<sub>3</sub> for flexible humidity sensor with high selectivity. *J. Mater. Chem. A* **2019**, *7*, 14545–14551, doi:10.1039/C9TA03214B.
16. Li, N.; Jiang, Y.; Xiao, Y.; Meng, B.; Xing, C.; Zhang, H.; Peng, Z. A fully inkjet-printed transparent humidity sensor based on a Ti<sub>3</sub>C<sub>2</sub>/Ag hybrid for touchless sensing of finger motion. *Nanoscale* **2019**, *11*, 21522–21531, doi:10.1039/c9nr06751e.
17. Duan, Z.; Jiang, Y.; Yan, M.; Wang, S.; Yuan, Z.; Zhao, Q.; Sun, P.; Xie, G.; Du, X.; Tai, H. Facile, Flexible, Cost-Saving, and Environment-Friendly Paper-Based Humidity Sensor for Multifunctional Applications. *ACS Appl. Mater. Interfaces* **2019**, *11*, 21840–21849, doi:10.1021/acsami.9b05709.
18. Dai, J.; Zhao, H.; Lin, X.; Liu, S.; Liu, Y.; Liu, X.; Fei, T.; Zhang, T. Ultrafast Response Polyelectrolyte Humidity Sensor for Respiration Monitoring. *ACS Appl. Mater. Interfaces* **2019**, doi:10.1021/acsami.8b18904.
19. Yang, J.; Shi, R.; Lou, Z.; Chai, R.; Jiang, K.; Shen, G. Flexible Smart Noncontact Control Systems with Ultrasensitive Humidity Sensors. *Small* **2019**, *15*, 1902801, doi:10.1002/sml.201902801.
20. Dai, J.; Zhao, H.; Lin, X.; Liu, S.; Fei, T.; Zhang, T. Design strategy for ultrafast-response humidity sensors based on gel polymer electrolytes and application for detecting respiration. *Sensors Actuators B Chem.* **2020**, *304*, 127270, doi:10.1016/j.snb.2019.127270.

21. Dai, J.; Guan, X.; Zhao, H.; Liu, S.; Fei, T.; Zhang, T. In Situ Preparation of Porous Humidity Sensitive Composite via a One-Stone-Two-Birds Strategy. *Sensors Actuators, B Chem.* **2020**, *316*, 128159, doi:10.1016/j.snb.2020.128159.
22. Kano, S.; Mekaru, H. Nonporous Inorganic Nanoparticle-Based Humidity Sensor: Evaluation of Humidity Hysteresis and Response Time. *Sensors* **2020**, *20*, 3858, doi:10.3390/s20143858.
23. Zhang, D.; Xu, Z.; Yang, Z.; Song, X. High-performance flexible self-powered tin disulfide nanoflowers/reduced graphene oxide nanohybrid-based humidity sensor driven by triboelectric nanogenerator. *Nano Energy* **2020**, *67*, 104251, doi:10.1016/j.nanoen.2019.104251.
24. Yu, S.; Zhang, H.; Zhang, J. Synthesis of high response gold/titanium dioxide humidity sensor and its application in human respiration. *Ceram. Int.* **2021**, *47*, 30880–30887, doi:10.1016/j.ceramint.2021.07.270.
25. Guan, X.; Hou, Z.; Wu, K.; Zhao, H.; Liu, S.; Fei, T.; Zhang, T. Flexible humidity sensor based on modified cellulose paper. *Sensors Actuators B Chem.* **2021**, *339*, 129879, doi:10.1016/j.snb.2021.129879.
26. Xu, L.; Zhai, H.; Chen, X.; Liu, Y.; Wang, M.; Liu, Z.; Umar, M.; Ji, C.; Chen, Z.; Jin, L.; et al. Coolmax/graphene-oxide functionalized textile humidity sensor with ultrafast response for human activities monitoring. *Chem. Eng. J.* **2021**, *412*, doi:10.1016/j.cej.2021.128639.
27. Yu, S.; Chen, C.; Zhang, H.; Zhang, J.; Liu, J. Design of high sensitivity graphite carbon nitride/zinc oxide humidity sensor for breath detection. *Sensors Actuators, B Chem.* **2021**, *332*, 129536, doi:10.1016/j.snb.2021.129536.
28. Lu, Y.; Xu, K.; Yang, M.Q.; Tang, S.Y.; Yang, T.Y.; Fujita, Y.; Honda, S.; Arie, T.; Akita, S.; Chueh, Y.L.; et al. Highly stable Pd/HNb3O8-based flexible humidity sensor for perdurable wireless wearable applications. *Nanoscale Horizons* **2021**, *6*, 260–270, doi:10.1039/d0nh00594k.
29. Kumar, A.; Kumar, A.; Varma, G.D. Ultrafast resistive-type  $\gamma$ -Fe<sub>2</sub>O<sub>3</sub>-rGO nanohybrid-based humidity sensor – a respiratory monitoring tool. *J. Mater. Chem. C* **2021**, *9*, 8002–8010, doi:10.1039/d1tc01217g.
30. Zhang, D.; Zong, X.; Wu, Z.; Zhang, Y. Hierarchical Self-Assembled SnS<sub>2</sub> Nanoflower/Zn<sub>2</sub>SnO<sub>4</sub> Hollow Sphere Nanohybrid for Humidity-Sensing Applications. *ACS Appl. Mater. Interfaces* **2018**, *10*, 32631–32639, doi:10.1021/acsami.8b08493.
31. Ma, L.; Wu, R.; Patil, A.; Zhu, S.; Meng, Z.; Meng, H.; Hou, C.; Zhang, Y.; Liu, Q.; Yu, R.; et al. Full-Textile Wireless Flexible Humidity Sensor for Human Physiological Monitoring. *Adv. Funct. Mater.* **2019**, *29*, 1–9, doi:10.1002/adfm.201904549.
32. Li, B.; Tian, Q.; Su, H.; Wang, X.; Wang, T.; Zhang, D. High sensitivity portable capacitive humidity sensor based on In<sub>2</sub>O<sub>3</sub> nanocubes-decorated GO nanosheets and its wearable application in respiration detection. *Sensors Actuators, B Chem.* **2019**, *299*, 126973, doi:10.1016/j.snb.2019.126973.
33. Cho, M.Y.; Kim, I.S.; Kim, S.H.; Park, C.; Kim, N.Y.; Kim, S.W.; Kim, S.; Oh, J.M. Unique Noncontact Monitoring of Human Respiration and Sweat Evaporation Using a CsPb<sub>2</sub>Br<sub>5</sub>-Based Sensor. *ACS Appl. Mater. Interfaces* **2021**, *13*, 5602–5613, doi:10.1021/acsami.0c21097.

34. Zhang, L.; Tan, Q.; Wang, Y.; Fan, Z.; Lin, L.; Zhang, W.; Xiong, J. Wirelessly powered multi-functional wearable humidity sensor based on RGO-WS2 heterojunctions. *Sensors Actuators, B Chem.* **2021**, *329*, 129077, doi:10.1016/j.snb.2020.129077.
35. Yu, L.; Xu, H.; Monro, T.M.; Lancaster, D.G.; Xie, Y.; Zeng, H.; Chen, G.Y.; Liu, X. Ultrafast colorimetric humidity-sensitive polyelectrolyte coating for touchless control. *Mater. Horizons* **2017**, *4*, 72–82, doi:10.1039/c6mh00317f.
36. Mathew, J.; Semenova, Y.; Farrell, G. A fiber bend based humidity sensor with a wide linear range and fast measurement speed. *Sensors Actuators, A Phys.* **2012**, *174*, 47–51, doi:10.1016/j.sna.2011.11.029.
37. Mohd-Noor, S.; Jang, H.; Baek, K.; Pei, Y.-R.; Alam, A.-M.; Kim, Y.H.; Kim, I.S.; Choy, J.-H.; Hyun, J.K. Ultrafast humidity-responsive structural colors from disordered nanoporous titania microspheres. *J. Mater. Chem. A* **2019**, *7*, 10561–10571, doi:10.1039/C9TA01394F.
38. Du, B.; Yang, D.; Ruan, Y.; Jia, P.; Ebendorff-Heidepriem, H. Compact plasmonic fiber tip for sensitive and fast humidity and human breath monitoring. *Opt. Lett.* **2020**, *45*, 985, doi:10.1364/OL.381085.
39. Jarulertwathana, N.; Mohd-Noor, S.; Hyun, J.K. Mesoporous Solid and Yolk-Shell Titania Microspheres as Touchless Colorimetric Sensors with High Responsivity and Ultrashort Response Times. *ACS Appl. Mater. Interfaces* **2021**, *13*, 44786–44796, doi:10.1021/acsami.1c12514.
40. Kan, H.; Li, M.; Li, H.; Li, C.; Zhou, J.; Fu, C.; Luo, J.; Fu, Y. A novel quartz-crystal microbalance humidity sensor based on solution-processible indium oxide quantum dots. *RSC Adv.* **2019**, *9*, 38531–38537, doi:10.1039/C9RA06385D.
41. Chen, Q.; Feng, N.B.; Huang, X.H.; Yao, Y.; Jin, Y.R.; Pan, W.; Liu, D. Humidity-Sensing Properties of a BiOCl-Coated Quartz Crystal Microbalance. *ACS Omega* **2020**, *5*, 18818–18825, doi:10.1021/acsomega.0c01946.
42. Rimeika, R.; Čiplys, D.; Poderys, V.; Rotomskis, R.; Shur, M.S. Fast-response surface acoustic wave humidity sensor based on hematoporphyrin film. *Sensors Actuators, B Chem.* **2009**, *137*, 592–596, doi:10.1016/j.snb.2009.02.009.
43. Su, Y.; Li, C.; Li, M.; Li, H.; Xu, S.; Qian, L.; Yang, B. Surface acoustic wave humidity sensor based on three-dimensional architecture graphene/PVA/SiO<sub>2</sub> and its application for respiration monitoring. *Sensors Actuators, B Chem.* **2020**, *308*, 127693, doi:10.1016/j.snb.2020.127693.
44. Zhao, F.; Cheng, H.; Zhang, Z.; Jiang, L.; Qu, L. Direct Power Generation from a Graphene Oxide Film under Moisture. *Adv. Mater.* **2015**, *27*, 4351–4357, doi:10.1002/adma.201501867.
45. Shen, D.; Xiao, M.; Zou, G.; Liu, L.; Duley, W.W.; Zhou, Y.N. Self-Powered Wearable Electronics Based on Moisture Enabled Electricity Generation. *Adv. Mater.* **2018**, *30*, 1705925, doi:10.1002/adma.201705925.
46. Li, L.; Chen, Z.; Hao, M.; Wang, S.; Sun, F.; Zhao, Z.; Zhang, T. Moisture-Driven Power Generation for Multifunctional Flexible Sensing Systems. *Nano Lett.* **2019**, *19*, 5544–5552, doi:10.1021/acs.nanolett.9b02081.
47. Li, X.; Sun, Q.; Kan, Y.; Zhu, Y.; Pang, Z.; Li, M.; Jin, Y. Self-Powered Humidity Sensor Based on Polypyrrole/Melamine Aerogel for Real-Time Humidity Monitoring. *IEEE Sens. J.* **2021**, *21*, 2604–2609, doi:10.1109/JSEN.2020.3027743.
